# Supplementary material for: Ultralight and spongy La–Mn-based perovskite catalysts modified by alkali metals and Ce: facile synthesis and excellent catalytic performance for soot combustion
Source: Royal Society of Chemistry journal article supplement (doi:10.1039/d2cy02020c), 2023-01-01
Supplement: d2cy02020c1.pdf [file d2cy02020c1.pdf]

**Supporting information for**  
**Ultralight and Spongy La-Mn-based Perovskite Catalysts**  
**Modified by Alkali Metals and Ce: Facile Synthesis and Excellent**  
**Catalytic Performance for Soot Combustion**

Xuehua Yu<sup>a</sup>, Di Yu<sup>b</sup>, Lanyi Wang<sup>b</sup>, Yu Ren<sup>b</sup>, Maozhong Chen<sup>a</sup>, Xiaoqiang Fan<sup>a</sup>, Zhen Zhao<sup>a,b\*</sup>,

Zbigniew Sojka<sup>c</sup>, Andrzej Kotarba<sup>c</sup>, Yuechang Wei<sup>b</sup>, Jian Liu<sup>b</sup>

a. Institute of Catalysis for Energy and Environment, College of Chemistry and Chemical Engineering, Shenyang Normal University, Shenyang, Liaoning, 110034, China.

b. State Key Laboratory of Heavy Oil Processing, China University of Petroleum, 18# Fuxue Road, Chang Ping, Beijing 102249, China.

c. Faculty of Chemistry, Jagiellonian University, ul. Gronostajowa 2, 30-387 Kraków, Poland

---

\* Corresponding author:

Zhen Zhao, Email: zhenzhao@cup.edu.cn

## Experimental details

The reaction rate ( $v$  and  $v^*$ ), active redox sites ( $O^*$  amount), density of active redox sites ( $O^*$  density) and TOF values of catalysts were determined by isothermal reaction for soot combustion, and their values are calculated by the following equations<sup>[1]</sup>:

$$\text{TOF (s}^{-1}\text{)} = \frac{v}{O^* \text{ amount}}$$

$$v \text{ (mol s}^{-1} \text{ g}^{-1}\text{)} = -\frac{dn}{m dt} = \frac{x_{CO_2} \times n_{CO_2}}{m}$$

$$v^* \text{ (mol s}^{-1} \text{ m}^{-2}\text{)} = \frac{v}{S} = \frac{x_{CO_2} \times n_{CO_2}}{mS}$$

where  $x_{CO_2}$  is the mole fraction of  $CO_2$ ;  $n_{CO_2}$  is the molar amount of  $CO_2$  (mol);  $m$  is the mass of the catalyst (g);  $S$  is the BET specific surface area of catalyst ( $m^2/g$ )

$$O^* \text{ amount (mol g}^{-1}\text{)} = \frac{2P_0V \times A \times 10^{-6}}{RTm}$$

$$O^* \text{ density (nm}^{-2}\text{)} = \frac{O^* \text{ amount}}{S \times 10^{18}} \times 6.02 \times 10^{23}$$

where  $P_0$  is the atmospheric pressure (Pa);  $A$  is the integrated area of  $CO_2$  concentration as a function of time (s);  $V$  is the volumetric flow rate of gases ( $m^3/s$ );  $m$  is the mass of the catalyst (g);  $R$  is the gas constant ( $8.314 \text{ J/mol}\cdot\text{K}$ );  $T$  is room temperature (K);  $S$  is the BET specific surface area ( $m^2/g$ ).

**Table S1** Recipes for the synthesis of as-prepared La-Mn-based perovskite catalysts

| Catalysts                                                                   | La(NO <sub>3</sub> ) <sub>3</sub> ·<br>6H <sub>2</sub> O<br>/g | Ce(NO <sub>3</sub> ) <sub>3</sub> ·<br>6H <sub>2</sub> O<br>/g | Alkali metal<br>nitrates   | Mn(NO <sub>3</sub> ) <sub>2</sub><br>/g | Glucose<br>/g | H <sub>2</sub> O/<br>mL |
|-----------------------------------------------------------------------------|----------------------------------------------------------------|----------------------------------------------------------------|----------------------------|-----------------------------------------|---------------|-------------------------|
| LaMnO <sub>3</sub>                                                          | 4.33                                                           | -                                                              | -                          | 3.56                                    | 3.92          | 20                      |
| La <sub>0.98</sub> Ce <sub>0.01</sub> Cs <sub>0.01</sub> MnO <sub>3</sub>   | 4.24                                                           | 0.0434                                                         | 0.0195 g CsNO <sub>3</sub> | 3.56                                    | 3.92          | 20                      |
| La <sub>0.96</sub> Ce <sub>0.02</sub> Cs <sub>0.02</sub> MnO <sub>3</sub>   | 4.16                                                           | 0.0868                                                         | 0.0390 g CsNO <sub>3</sub> | 3.56                                    | 3.92          | 20                      |
| La <sub>0.94</sub> Ce <sub>0.03</sub> Cs <sub>0.03</sub> MnO <sub>3</sub>   | 4.07                                                           | 0.1302                                                         | 0.0585 g CsNO <sub>3</sub> | 3.56                                    | 3.92          | 20                      |
| La <sub>0.9</sub> Ce <sub>0.05</sub> Cs <sub>0.05</sub> MnO <sub>3</sub>    | 3.90                                                           | 0.217                                                          | 0.0975 g CsNO <sub>3</sub> | 3.56                                    | 3.92          | 20                      |
| La <sub>0.85</sub> Ce <sub>0.075</sub> Cs <sub>0.075</sub> MnO <sub>3</sub> | 3.68                                                           | 0.325                                                          | 0.146 g CsNO <sub>3</sub>  | 3.56                                    | 3.92          | 20                      |
| La <sub>0.8</sub> Ce <sub>0.1</sub> Cs <sub>0.1</sub> MnO <sub>3</sub>      | 3.46                                                           | 0.434                                                          | 0.195 g CsNO <sub>3</sub>  | 3.56                                    | 3.92          | 20                      |
| La <sub>0.6</sub> Ce <sub>0.2</sub> Cs <sub>0.2</sub> MnO <sub>3</sub>      | 2.59                                                           | 0.868                                                          | 0.390 g CsNO <sub>3</sub>  | 3.56                                    | 3.92          | 20                      |
| La <sub>0.8</sub> Ce <sub>0.2</sub> MnO <sub>3</sub>                        | 3.46                                                           | 0.868                                                          | -                          | 3.56                                    | 3.92          | 20                      |
| La <sub>0.8</sub> Cs <sub>0.2</sub> MnO <sub>3</sub>                        | 3.46                                                           | -                                                              | 0.390 g CsNO <sub>3</sub>  | 3.56                                    | 3.92          | 20                      |
| La <sub>0.8</sub> Ce <sub>0.1</sub> Li <sub>0.1</sub> MnO <sub>3</sub>      | 3.46                                                           | 0.434                                                          | 0.068 g LiNO <sub>3</sub>  | 3.56                                    | 3.92          | 20                      |
| La <sub>0.8</sub> Ce <sub>0.1</sub> Na <sub>0.1</sub> MnO <sub>3</sub>      | 3.46                                                           | 0.434                                                          | 0.084 g NaNO <sub>3</sub>  | 3.56                                    | 3.92          | 20                      |
| La <sub>0.8</sub> Ce <sub>0.1</sub> K <sub>0.1</sub> MnO <sub>3</sub>       | 3.46                                                           | 0.434                                                          | 0.101 g KNO <sub>3</sub>   | 3.56                                    | 3.92          | 20                      |
| La <sub>0.8</sub> Ce <sub>0.1</sub> Rb <sub>0.1</sub> MnO <sub>3</sub>      | 3.46                                                           | 0.434                                                          | 0.147 g RbNO <sub>3</sub>  | 3.56                                    | 3.92          | 20                      |

**Table S2.** Comparison for catalytic performance of as-prepared and reported catalysts for soot combustion

| Catalyst                                                                                    | Soot/cat<br>alyst<br>weight<br>ratio | Contact<br>mode | Reaction<br>conditions                                                                   | Heating<br>rate<br>(°C/min) | T <sub>10</sub><br>(°C) | T <sub>50</sub> /T <sub>m</sub><br>(°C) | T <sub>90</sub><br>(°C) | Sm<br>CO <sub>2</sub> (%)<br>) | Ref          |
|---------------------------------------------------------------------------------------------|--------------------------------------|-----------------|------------------------------------------------------------------------------------------|-----------------------------|-------------------------|-----------------------------------------|-------------------------|--------------------------------|--------------|
| 3DOM<br>La <sub>2</sub> NiCoO <sub>6</sub>                                                  | 1/10                                 | Loose           | Flow 50 mL/min,<br>5%O <sub>2</sub> +0.2%NO+<br>5%H <sub>2</sub> O+Ar balance            | 2                           | 288                     | 362                                     | 412                     | 98.6                           | 2            |
| La <sub>(1-x)</sub> Ag <sub>x</sub> CoO <sub>3</sub><br>(x=2.5%)                            | 1/10                                 | Loose           | Flow 300 mL/min,<br>10%O <sub>2</sub> +500 ppm<br>NO+N <sub>2</sub> balance              | 4                           | 302                     | 358                                     | 448                     | -                              | 3            |
| 3DOM<br>La <sub>0.95</sub> K <sub>0.05</sub> NiO <sub>3</sub>                               | 1/10                                 | Loose           | Flow 50 mL/min,<br>5%O <sub>2</sub> +2000 ppm<br>NO+N <sub>2</sub> balance               | 2                           | 289                     | 338                                     | 372                     | 98.7                           | 4            |
| K-Mn/3DOM<br>La <sub>0.8</sub> Ce <sub>0.2</sub> FeO <sub>3</sub>                           | 1/9                                  | Loose           | Flow 50 mL/min,<br>5%O <sub>2</sub> +500 ppm<br>NO+N <sub>2</sub> balance                | 2                           | 316                     | 377                                     | 430                     | 96.5                           | 5            |
| LaCo <sub>0.94</sub> Pt <sub>0.06</sub> O <sub>3</sub>                                      | 1/10                                 | Loose           | Flow 100 mL/min,<br>2000 ppm NO/air                                                      | 10                          | 344                     | 403                                     | 435                     | -                              | 6            |
| 3DOM<br>La <sub>0.5</sub> Sr <sub>0.5</sub> MnO <sub>3</sub>                                | 1/9                                  | Loose           | Flow 100mL/min,<br>20% O <sub>2</sub> +500ppm NO<br>+ N <sub>2</sub> balance             | 5                           | 320                     | 385                                     | 428                     | -                              | 7            |
| La <sub>0.7</sub> K <sub>0.3</sub> FeO <sub>3-δ</sub><br>nanotubes                          | 1/9                                  | Loose           | Flow 100 mL/min,<br>20%O <sub>2</sub> +500 ppm NO                                        | 2                           | 355                     | 393                                     | 429                     | 94.0                           | 8            |
| Ce <sub>1</sub> MnO <sub>x</sub>                                                            | 1/10                                 | Loose           | Flow 50 mL/min,<br>10%O <sub>2</sub> +2000 ppm<br>NO+Ar balance                          | 2                           | 268                     | 332                                     | 369                     | 99.4                           | 9            |
| K-OMS-2/3DOMM<br>Ti <sub>0.7</sub> Si <sub>0.3</sub> O <sub>2</sub>                         | 1/10                                 | Loose           | Flow 50 mL/min,<br>10% O <sub>2</sub> +0.2%<br>NO+Ar balance                             | 2                           | 288                     | 333                                     | 364                     | 97.8                           | 10           |
| MnO <sub>x</sub> -CeO <sub>2</sub>                                                          | 1/9                                  | Loose           | Flow 100 mL/min,<br>10%O <sub>2</sub> +N <sub>2</sub> balance                            | 3                           | 314                     | 346                                     | 383                     | -                              | 11           |
| 3DOM<br>Au <sub>2</sub> Pt <sub>2</sub> /Ce <sub>0.8</sub> Zr <sub>0.2</sub> O <sub>2</sub> | 1/10                                 | Loose           | Flow 50mL/min,<br>10%O <sub>2</sub> +0.2%NO+bal<br>ance                                  | 2                           | 236                     | 345                                     | 397                     | 99.5                           | 12           |
| 3 wt.%<br>Pt/Mn <sub>0.5</sub> Ce <sub>0.5</sub> O <sub>2-δ</sub>                           | 1/10                                 | Loose           | Flow 50 mL/min,<br>10% O <sub>2</sub> +0.2%<br>NO+Ar balance                             | 2                           | 290                     | 342                                     | 373                     | 96.7                           | 13           |
| Pt-CoO<br>x/3DOM-Al <sub>2</sub> O <sub>3</sub>                                             | 1/10                                 | Loose           | Flow 50 mL/min,<br>5%O <sub>2</sub> +0.2%NO+Ar<br>balance                                | 2                           | 281                     | 368                                     | 416                     | 99.1                           | 14           |
| PdAu@CeO <sub>2</sub> /CZ                                                                   | 1/10                                 | Loose           | Flow 50mL/min,<br>5%O <sub>2</sub> +0.2%H <sub>2</sub> O+Ar<br>balance                   | 2                           | 276                     | 363                                     | 404                     | 99.6                           | 15           |
| La <sub>0.8</sub> Ce <sub>0.1</sub> Cs <sub>0.1</sub> MnO <sub>3</sub>                      | 1/10                                 | Loose           | Flow 50 mL/min,<br>10%O <sub>2</sub> +2000 ppm<br>NO +Ar balance                         | 2                           | 268                     | 315                                     | 350                     | 98.5                           | This<br>work |
| La <sub>0.8</sub> Ce <sub>0.1</sub> Cs <sub>0.1</sub> MnO <sub>3</sub>                      | 1/10                                 | Loose           | Flow 50 mL/min,<br>10%O <sub>2</sub> +2000 ppm<br>NO ++10%H <sub>2</sub> O+Ar<br>balance | 2                           | 265                     | 304                                     | 329                     | 96.7                           | This<br>work |

**Table S3** The stability and sulfur water resistant of  $\text{La}_{0.8}\text{Ce}_{0.1}\text{Cs}_{0.1}\text{MnO}_3$  catalysts for soot combustion

| Catalysts                                                            | $T_{10}/^{\circ}\text{C}$ | $T_{50}/^{\circ}\text{C}$ | $T_{90}/^{\circ}\text{C}$ | $\text{S}_{\text{CO}_2^{\text{m}}}/\%$ |
|----------------------------------------------------------------------|---------------------------|---------------------------|---------------------------|----------------------------------------|
| $\text{La}_{0.8}\text{Ce}_{0.1}\text{Cs}_{0.1}\text{CoO}_3$ -Cycle 1 | 268                       | 314                       | 350                       | 98.5                                   |
| $\text{La}_{0.8}\text{Ce}_{0.1}\text{Cs}_{0.1}\text{CoO}_3$ -Cycle 2 | 272                       | 319                       | 350                       | 98.3                                   |
| $\text{La}_{0.8}\text{Ce}_{0.1}\text{Cs}_{0.1}\text{CoO}_3$ -Cycle 3 | 269                       | 318                       | 351                       | 98                                     |
| $\text{La}_{0.8}\text{Ce}_{0.1}\text{Cs}_{0.1}\text{CoO}_3$ -Cycle 4 | 280                       | 329                       | 361                       | 97.5                                   |
| $\text{La}_{0.8}\text{Ce}_{0.1}\text{Cs}_{0.1}\text{CoO}_3$ -Cycle 5 | 279                       | 329                       | 361                       | 97.8                                   |
| 10% $\text{H}_2\text{O}$ +0 ppm $\text{SO}_2$                        | 265                       | 304                       | 329                       | 96.7                                   |
| 10% $\text{H}_2\text{O}$ +100 ppm $\text{SO}_2$                      | 296                       | 332                       | 442                       | 93.8                                   |
| 10% $\text{H}_2\text{O}$ +300 ppm $\text{SO}_2$                      | 387                       | 459                       | 500                       | 82.8                                   |

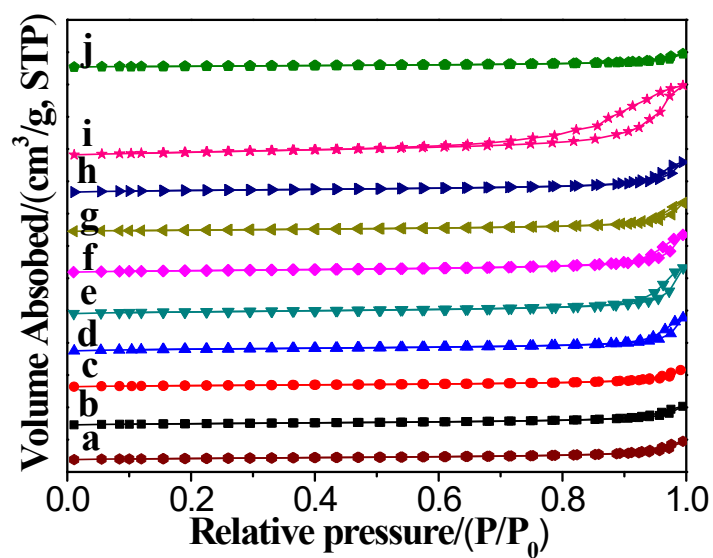

Figure S1. Nitrogen adsorption-desorption isotherms of La-Mn-based perovskite catalysts with different A sites (a:  $\text{LaMnO}_3$ ; b:  $\text{La}_{0.98}\text{Ce}_{0.01}\text{Cs}_{0.01}\text{MnO}_3$ ; c:  $\text{La}_{0.96}\text{Ce}_{0.02}\text{Cs}_{0.02}\text{MnO}_3$ ; d:  $\text{La}_{0.94}\text{Ce}_{0.03}\text{Cs}_{0.03}\text{MnO}_3$ ; e:  $\text{La}_{0.9}\text{Ce}_{0.05}\text{Cs}_{0.05}\text{MnO}_3$ ; f:  $\text{La}_{0.85}\text{Ce}_{0.075}\text{Cs}_{0.075}\text{MnO}_3$ ; g:  $\text{La}_{0.8}\text{Ce}_{0.1}\text{Cs}_{0.1}\text{MnO}_3$ ; h:  $\text{La}_{0.6}\text{Ce}_{0.2}\text{Cs}_{0.2}\text{MnO}_3$ ; i:  $\text{La}_{0.8}\text{Ce}_{0.2}\text{MnO}_3$ ; j:  $\text{La}_{0.8}\text{Cs}_{0.2}\text{MnO}_3$ )

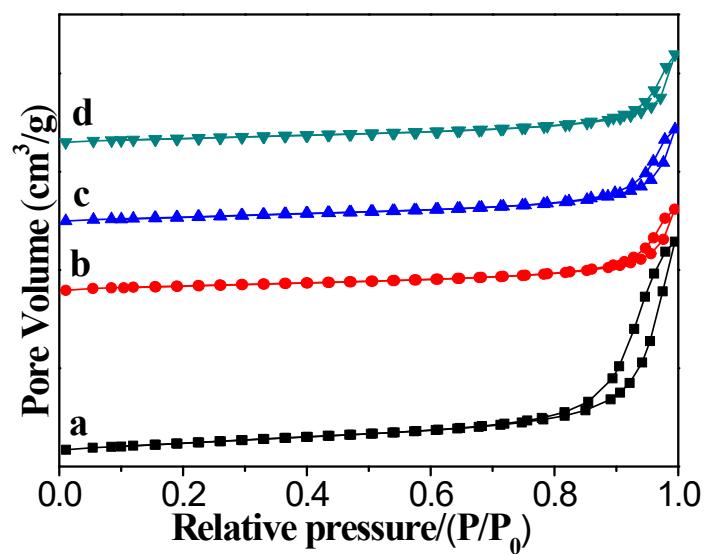

Figure S2. Nitrogen adsorption-desorption isotherms of  $\text{La}_{0.8}\text{Ce}_{0.1}\text{A}_{0.1}\text{MnO}_3$  catalyst  
(a:  $\text{La}_{0.8}\text{Ce}_{0.1}\text{Li}_{0.1}\text{MnO}_3$ ; b:  $\text{La}_{0.8}\text{Ce}_{0.1}\text{Na}_{0.1}\text{MnO}_3$ ; c:  $\text{La}_{0.8}\text{Ce}_{0.1}\text{K}_{0.1}\text{MnO}_3$ ; d:  $\text{La}_{0.8}\text{Ce}_{0.1}\text{Rb}_{0.1}\text{MnO}_3$ )

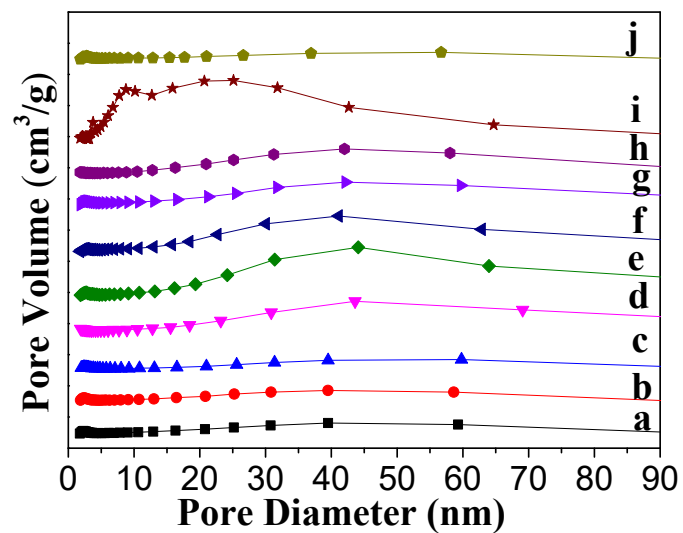

Figure S3. Pore distribution of La-Mn-based perovskite catalysts with different A sites  
(a:  $\text{LaMnO}_3$ ; b:  $\text{La}_{0.98}\text{Ce}_{0.01}\text{Cs}_{0.01}\text{MnO}_3$ ; c:  $\text{La}_{0.96}\text{Ce}_{0.02}\text{Cs}_{0.02}\text{MnO}_3$ ; d:  $\text{La}_{0.94}\text{Ce}_{0.03}\text{Cs}_{0.03}\text{MnO}_3$ ; e:  
 $\text{La}_{0.9}\text{Ce}_{0.05}\text{Cs}_{0.05}\text{MnO}_3$ ; f:  $\text{La}_{0.85}\text{Ce}_{0.075}\text{Cs}_{0.075}\text{MnO}_3$ ; g:  $\text{La}_{0.8}\text{Ce}_{0.1}\text{Cs}_{0.1}\text{MnO}_3$ ; h:  $\text{La}_{0.6}\text{Ce}_{0.2}\text{Cs}_{0.2}\text{MnO}_3$ ; i:  
 $\text{La}_{0.8}\text{Ce}_{0.2}\text{MnO}_3$ ; j:  $\text{La}_{0.8}\text{Cs}_{0.2}\text{MnO}_3$ )



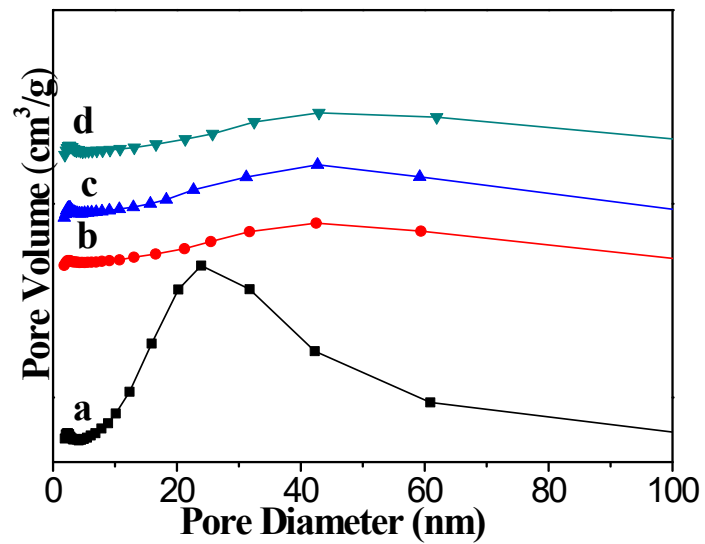

Figure S4. Pore distribution of  $\text{La}_{0.8}\text{Ce}_{0.1}\text{A}_{0.1}\text{MnO}_3$  catalysts  
(a:  $\text{La}_{0.8}\text{Ce}_{0.1}\text{Li}_{0.1}\text{MnO}_3$ ; b:  $\text{La}_{0.8}\text{Ce}_{0.1}\text{Na}_{0.1}\text{MnO}_3$ ; c:  $\text{La}_{0.8}\text{Ce}_{0.1}\text{K}_{0.1}\text{MnO}_3$ ; d:  $\text{La}_{0.8}\text{Ce}_{0.1}\text{Rb}_{0.1}\text{MnO}_3$ )

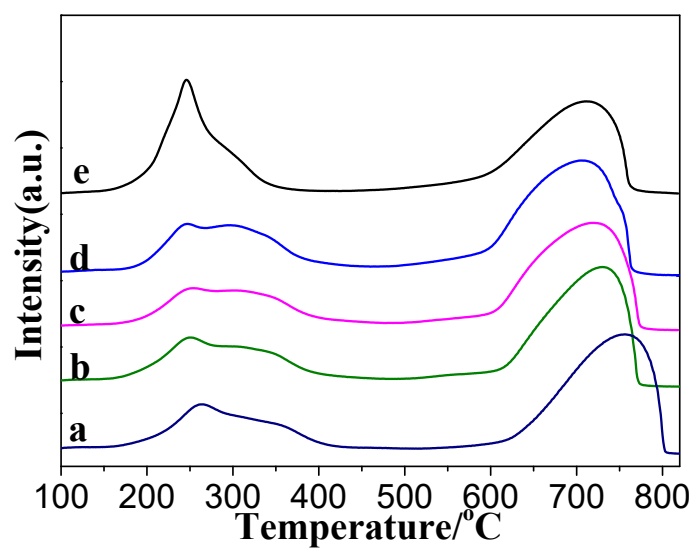

Figure S5. H<sub>2</sub>-TPR curves of La-Mn-based perovskite catalysts with different A sites  
 a: LaMnO<sub>3</sub>; b: La<sub>0.98</sub>Ce<sub>0.01</sub>Cs<sub>0.01</sub>MnO<sub>3</sub>; c: La<sub>0.96</sub>Ce<sub>0.02</sub>Cs<sub>0.02</sub>MnO<sub>3</sub>; d: La<sub>0.94</sub>Ce<sub>0.03</sub>Cs<sub>0.03</sub>MnO<sub>3</sub>; e:  
 La<sub>0.85</sub>Ce<sub>0.075</sub>Cs<sub>0.075</sub>MnO<sub>3</sub>)

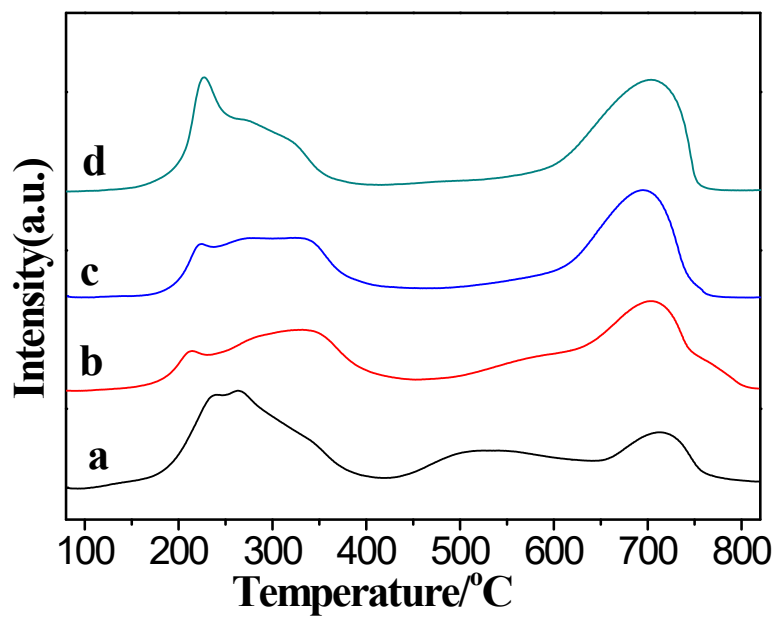

Figure S6. H<sub>2</sub>-TPR curves of La<sub>0.8</sub>Ce<sub>0.1</sub>A<sub>0.1</sub>MnO<sub>3</sub> catalysts  
(a: La<sub>0.8</sub>Ce<sub>0.1</sub>Li<sub>0.1</sub>MnO<sub>3</sub>; b: La<sub>0.8</sub>Ce<sub>0.1</sub>Na<sub>0.1</sub>MnO<sub>3</sub>; c: La<sub>0.8</sub>Ce<sub>0.1</sub>K<sub>0.1</sub>MnO<sub>3</sub>; d: La<sub>0.8</sub>Ce<sub>0.1</sub>Rb<sub>0.1</sub>MnO<sub>3</sub>)

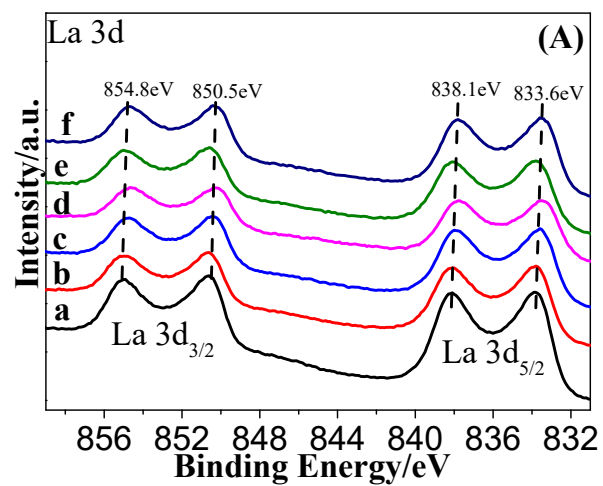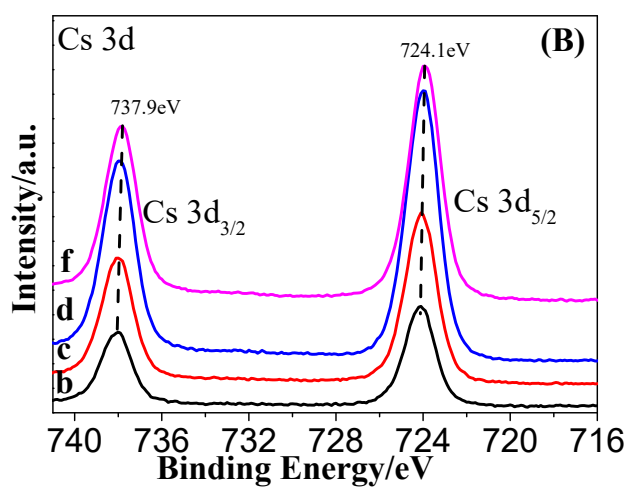

Figure S7. XPS spectra of La 3d (A) and Cs 3d (B) for as-prepared catalysts (a: LaMnO<sub>3</sub>; b: La<sub>0.9</sub>Ce<sub>0.05</sub>Cs<sub>0.05</sub>MnO<sub>3</sub>; c: La<sub>0.8</sub>Ce<sub>0.1</sub>Cs<sub>0.1</sub>MnO<sub>3</sub>; d: La<sub>0.6</sub>Ce<sub>0.2</sub>Cs<sub>0.2</sub>MnO<sub>3</sub>; e: La<sub>0.8</sub>Ce<sub>0.2</sub>MnO<sub>3</sub>; f: La<sub>0.8</sub>Cs<sub>0.2</sub>MnO<sub>3</sub>)

## References

- [1] Z. L. Zhang, D. Han, S. J. Wei and Y. X. Zhang, *J. Catal.*, 2010, **276**, 16-23.
- [2] X. L. Mei, J. Xiong, Y. C. Wei, Y. L. Zhang, P. Zhang, Q. Yu, Z. Zhao and J. Liu, *Appl. Catal. B: Environ.*, 2020, **275**, 119108.
- [3] L. J. He, Y. Zhang, Y. C. Zang, C. X. Liu, W. C. Wang, R. Han, N. Ji, S. T. Zhang and Q. L. Liu, *ACS Catal.*, 2021, **11**, 14224-14236.
- [4] X. Mei, J. Xiong, Y. Wei, C. Wang, Q. Wu, Z. Zhao and J. Liu, *Chin. J. Catal.*, 2019, **40**, 722-732.
- [5] N. J. Feng, C. Chen, J. Meng, G. Liu, F. Fang, L. Wang, H. Wan and G. F. Guan, *Appl. Surf. Sci.*, 2017, **399**, 114-122.
- [6] L. R. Zeng, L. Cui, C. Y. Wang, W. Guo and C. R. Gong, *J. Hazard. Mater.*, 2020, **383**, 121210.
- [7] P. Zhao, F. Fang, N. Feng, C. Chen, G. Liu, L. Chen, Z. Zhu, J. Meng, H. Wan and G. Guan, *Catal. Sci. Technol.*, 2019, **9**, 1835-1846.
- [8] F. Fang, N. Feng, L. Wang, J. Meng, G. Liu, P. Zhao, P. Gao, J. Ding, H. Wan and G. Guan, *Appl. Catal. B: Environ.*, 2018, **236**, 184-194.
- [9] D. Yu, C. Peng, X. H. Yu, L. Y. Wang, K. X. Li, Z. Zhao and Z. G. Li, *Fuel*, 2022, **307**, 121803.
- [10] X. Yu, Y. Ren, D. Yu, M. Chen, L. Wang, R. Wang, X. Fan, Z. Zhao, K. Cheng and Y. Chen, *ACS Catal.*, 2021, **11**, 5554-5571.
- [11] J. Gao, Y. Xiong, Q. Zhang, Y. Jiang, J. Wang, S. Zou, M. Fu, J. Wu, Y. Hu and D. Ye, *Chem. Eng. J.*, 2020, **398**, 125448.
- [12] Y. C. Wei, Z. Zhao, B. F. Jin, X. H. Yu, J. Q. Jiao, K. X. Li, and J. Liu, *Catal. Today*, 2015, **251**, 103-113.
- [13] X. Yu, J. Li, Y. Wei, Z. Zhao, J. Liu, B. Jin, A. Duan and G. Jiang, *Ind. Eng. Chem. Res.*, 2014, **53**, 9653-9664.
- [14] Y. C. Wei, P. Zhang, J. Xiong, Q. Yu, Q. Q. Wu, Z. Zhao and J. Liu, *Environ. Sci. Technol.*, 2020, **54**, 6947-6956.
- [15] J. Xiong, X. Mei, J. Liu, Y. Wei, Z. Zhao, Z. Xie, and J. Li, *Appl. Catal. B: Environ.*, 2019, **251**, 247-60.
